# Supplementary material
Source: publisher figshare collection journal article supplement (https://karger.figshare.com/ndownloader/files/27948807)
Supplement: Supplementary file 1 [file 27948807]

**Supplementary Table S7.** Number of chromosomes and ManDra-A 5 repeat and ManDra-B FISH signals detected in the somatic chromosomes of two clone-origin triploid dojo loaches.

| Group | Number of signals |  | Number of chromosomes | | | | Total |
| --- | --- | --- | --- | --- | --- | --- | --- |
| ManDra-A 5 repeat － ManDra-B |  | 71 | … | 74 | 75 |
| Clone-origin triploid | 25－25 |  |  |  |  | 20 | 20 |
|  | 25－24 |  |  |  |  | 2 | 2 |
|  | 24－25 |  |  |  |  | 1 | 1 |
|  | 24－24 |  |  |  |  | 1 | 1 |
|  | 24－23 |  |  |  |  | 2 | 2 |
|  | 23－25 |  |  |  |  | 1 | 1 |
|  | 22－25 |  |  |  | 1 |  | 1 |
|  | 21－25 |  | 1 |  |  |  | 1 |
|  |  | Total | 1 |  | 1 | 27 | 29 |
|  |  |  |  |  |  |  |  |
